# Supplementary material for: A differential role for CXCR4 in the regulation of normal versus malignant breast stem cell activity
Source: PubMed Central journal article supplement (PMC3996659; doi:10.18632/oncotarget.1169), 2013-07-30
Supplement: oncotarget-05-0599-s002.pdf [file oncotarget-05-0599-s002.pdf]

**A differential role for CXCR4 in the regulation of normal versus malignant breast stem cell activity – Ablett et al**

**Supplementary table 1: Sequences of the forward and reverse primers used for qRT-PCR.**

| Gene           | Forward primer       | Reverse primer           |
|----------------|----------------------|--------------------------|
| CXCR4          | ATTGGGATCAGCATCGACTC | CAAACCTCACACCCTTGCTTG    |
| B2M            | ATCTGAGCAGGTTGCTCCAC | GACCAAGATGTTGATGTTGGATAA |
| $\beta$ -actin | CCAACCGCGAGAAGATGA   | CCAGAGGCGTACAGGGATAG     |
| GAPDH          | AGCCACATCGCTCAGACAC  | GCCCAATACGACCAAATCC      |
